# Supplementary material for: A mobile and portable trusted computing platform
Source: Springer Nature journal article supplement (doi:10.1186/1687-1499-2011-75), 2011-08-25

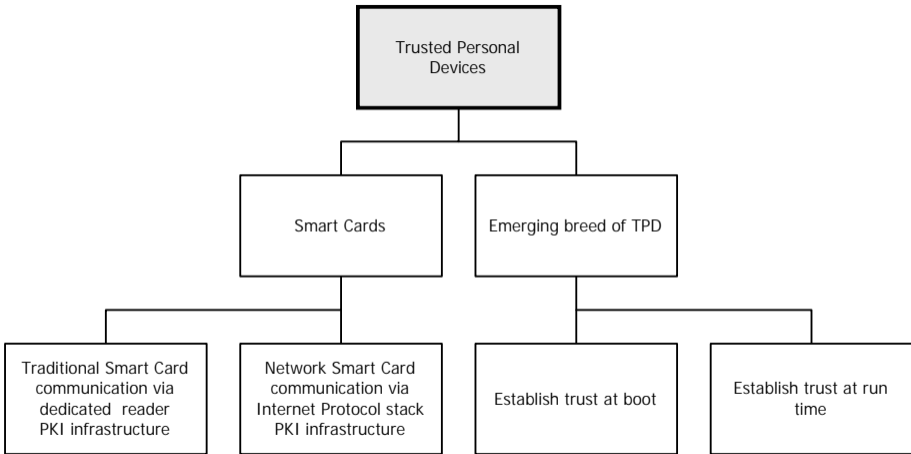

Supplement: 13638_2010_74_MOESM1_ESM.pdf [file 13638_2010_74_MOESM1_ESM.pdf]
