# Supplementary material for: A mobile and portable trusted computing platform
Source: Springer Nature journal article supplement (doi:10.1186/1687-1499-2011-75), 2011-08-25

ted.htm  
(on portable device)

```
<script>
Forwards data
....
....
....
</script>
```

index.htm  
(on application server)

```
<script> // Proxy Script

  1. Listens for any incoming responses
  2. Co-ordinates message exchange
....
....

</script>

<iFrame <src ted.htm> ... />
<iFrame <src privacy.htm> ... />
```

privacy.htm  
(on Privacy CA)

```
<script>
Forwards data
....
....
....
</script>
```

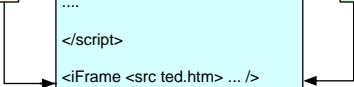

Supplement: 13638_2010_74_MOESM10_ESM.pdf [file 13638_2010_74_MOESM10_ESM.pdf]
