# Supplementary material for: A mobile and portable trusted computing platform
Source: Springer Nature journal article supplement (doi:10.1186/1687-1499-2011-75), 2011-08-25
Supplement: 13638_2010_74_MOESM11_ESM.pdf [file 13638_2010_74_MOESM11_ESM.pdf]

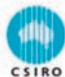

## Hardware TED Demonstration

[Log Off](#)

The balance of julian's accounts:

| Account Type            | Account Name  | Balance  |
|-------------------------|---------------|----------|
| Call Management Account | 100045459898  | 1000.95  |
| Streamline Unlimited    | 100479890000  | 810.95   |
| Cash Investment Account | 1222209993444 | 40000.25 |
| Term Deposit            | 123456781234  | 5680.0   |
| Visa                    | 909034349090  | 200.25   |

[Transfer Money](#)
