# Supplementary material for: A mobile and portable trusted computing platform
Source: Springer Nature journal article supplement (doi:10.1186/1687-1499-2011-75), 2011-08-25

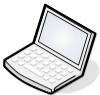

Host Machine A

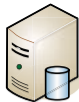

Host Machine B

Gap between  
Time-of-Measurement  
&  
Time-of-Verification

(2)

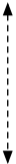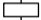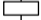

Time

Code measurement  $v$ ;  
 $v \rightarrow \text{PCR}$ ;  
AIK created

Validation of PCR, AIK

Code starts executing  
 $\text{PCR} == v$

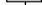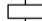

Time

Gap between  
Time-of-attestation  
&  
Time-of-Use

(1)

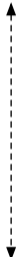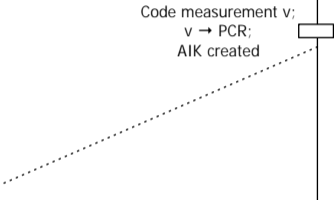

Supplement: 13638_2010_74_MOESM12_ESM.pdf [file 13638_2010_74_MOESM12_ESM.pdf]
